# Supplementary material for: A Fluorescent Coumarin-Based Probe for the Fast Detection of Cysteine with Live Cell Application
Source: PubMed Central journal article supplement (PMC6151380; doi:10.3390/molecules22101618), 2017-09-26
Supplement: molecules-22-01618-s001.pdf [file molecules-22-01618-s001.pdf]

## Supplementary data

### **A fluorescent coumarin-based probe for the fast detection of cysteine with live cell application**

Rui-Feng Zeng<sup>1†</sup>, Jin-Shuai Lan<sup>2†</sup>, Xiao-Die Li<sup>1</sup>, Hui-Fen Liang<sup>1</sup>, Yan Liao<sup>1</sup>, Ying-Jie Lu<sup>1</sup>, Tong Zhang<sup>1\*</sup>, Yue Ding<sup>2\*</sup>

1 School of Pharmacy, Shanghai University of Traditional Chinese Medicine, Shanghai 201203, China;

2 Experiment Center of Teaching & Learning, Shanghai University of Traditional Chinese Medicine, Shanghai 201203, China.

\* Corresponding author. Tong Zhang; Yue Ding

\* E-mail: zhangtongshutcm@hotmail.com (TZ); dingyue-2001@hotmail.com (YD)

† These authors contributed equally to this work.

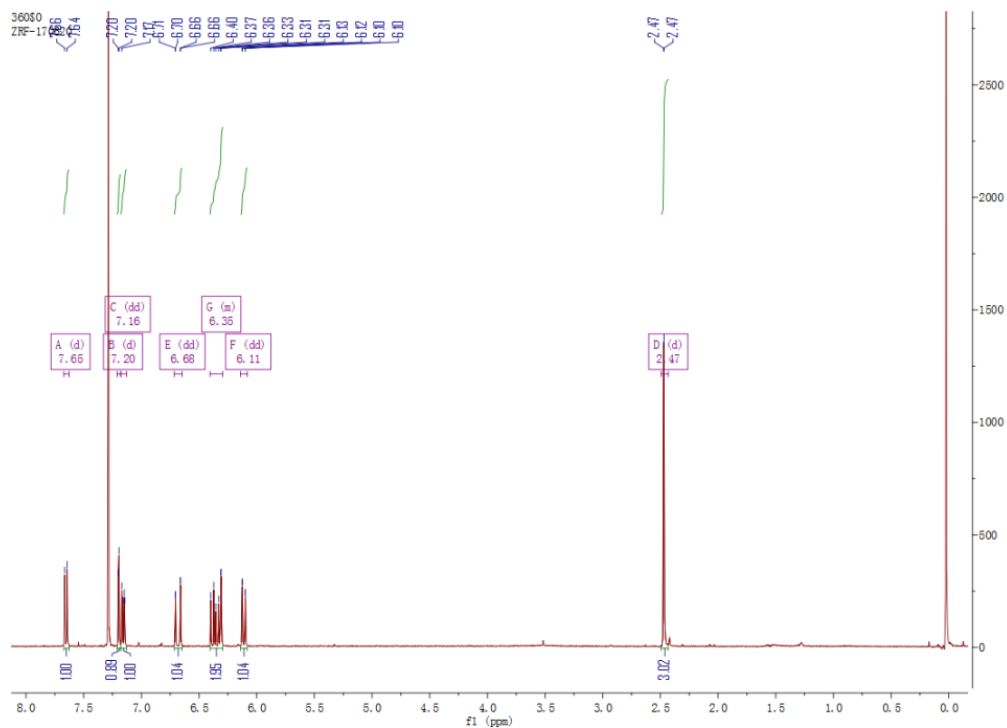

**Fig S1.**  $^1\text{H-NMR}$  spectrum of the probe in  $\text{CDCl}_3$ .

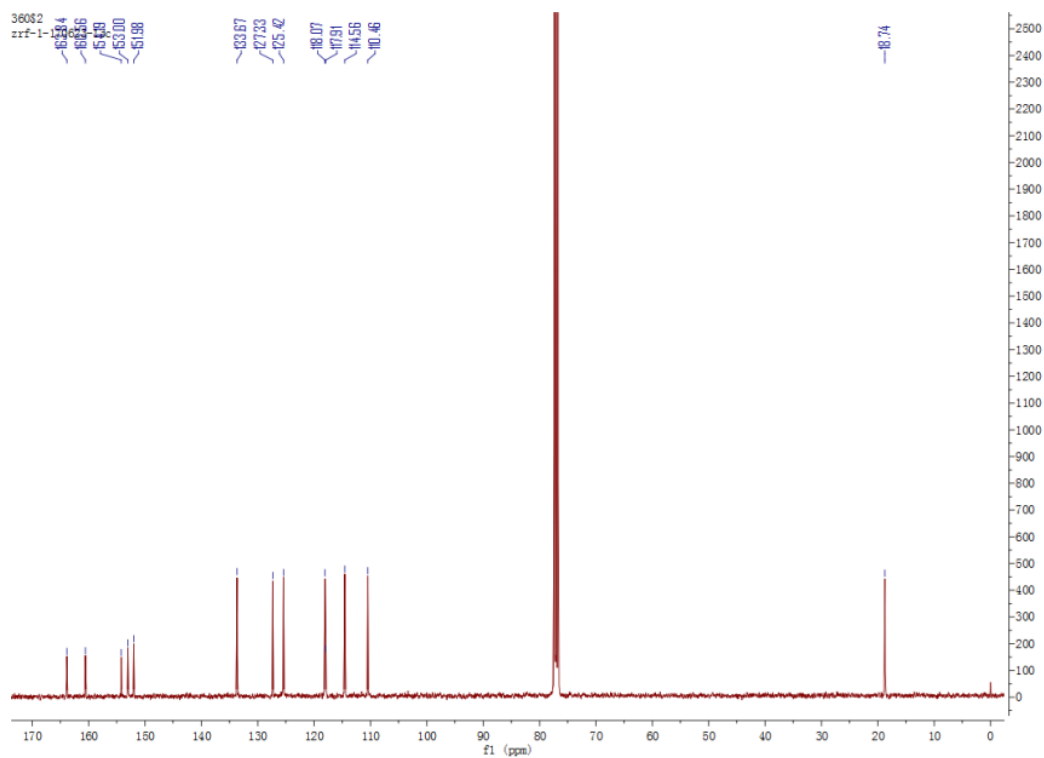

**Fig S2.**  $^{13}\text{C-NMR}$  spectrum of compound the probe in  $\text{CDCl}_3$ .

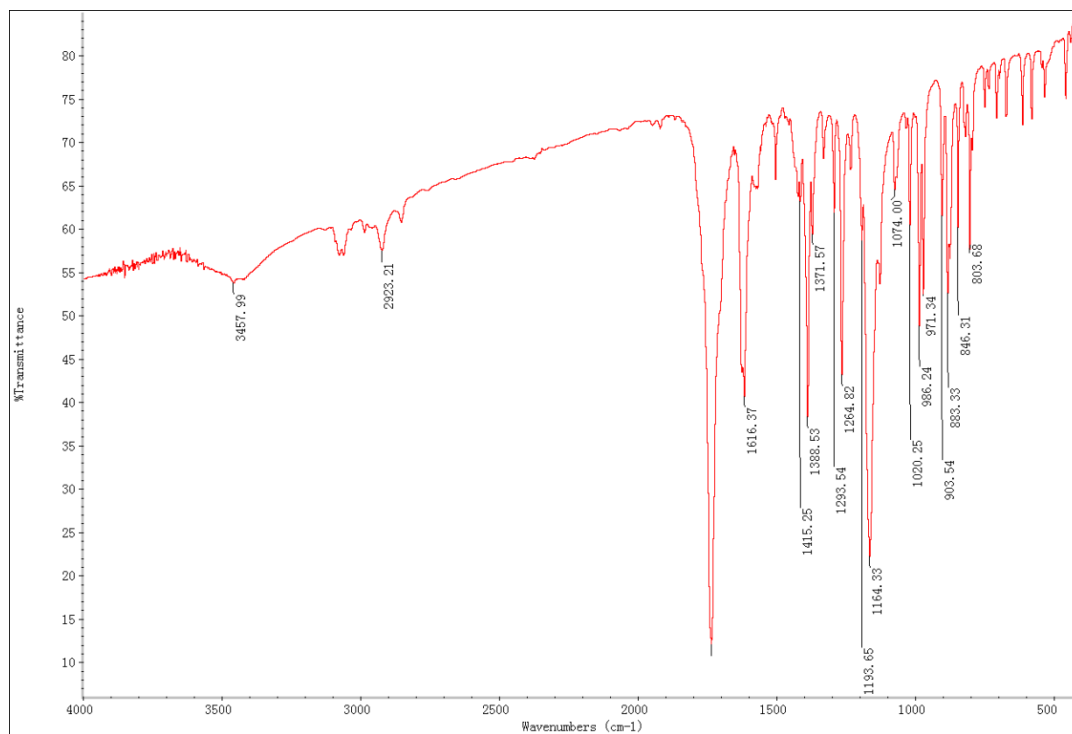

Fig S3. IR spectrum of compound the probe.

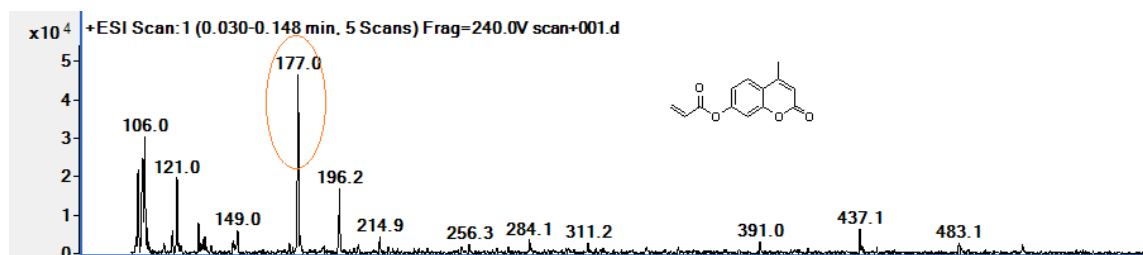

Fig S4. Mass spectrum of compound the probe.

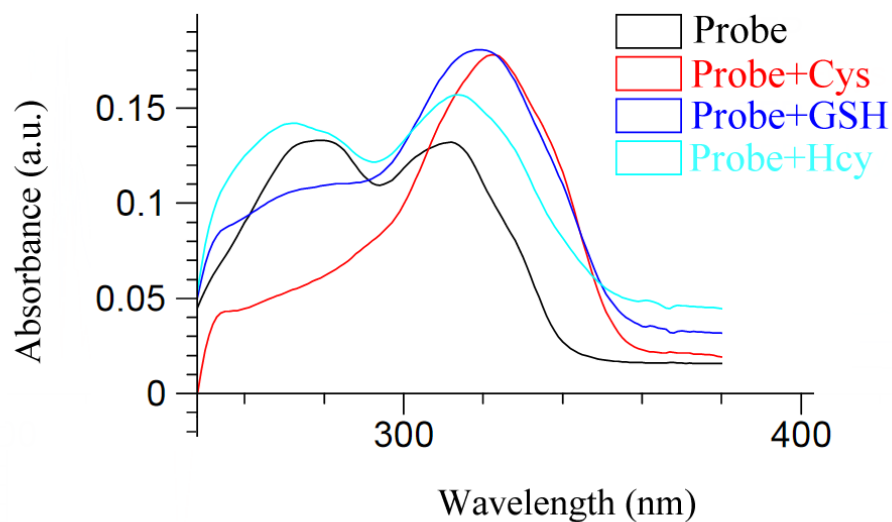

**Fig S5.** The absorption spectra of the probe and the probe added to Cys, GSH and Hcy in buffered solution (PBS:DMSO = 6: 4, PH = 7.4) at room temperature.

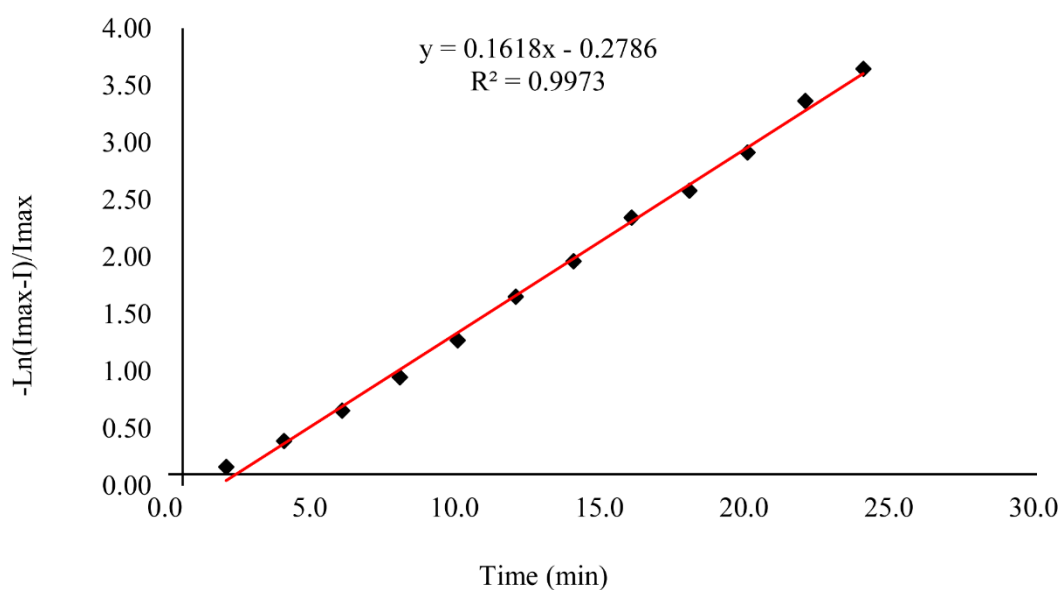

**Fig S6.** Pseudo-first-order rate figures of 10  $\mu\text{M}$  probe in the presence of 50  $\mu\text{M}$  Cys.

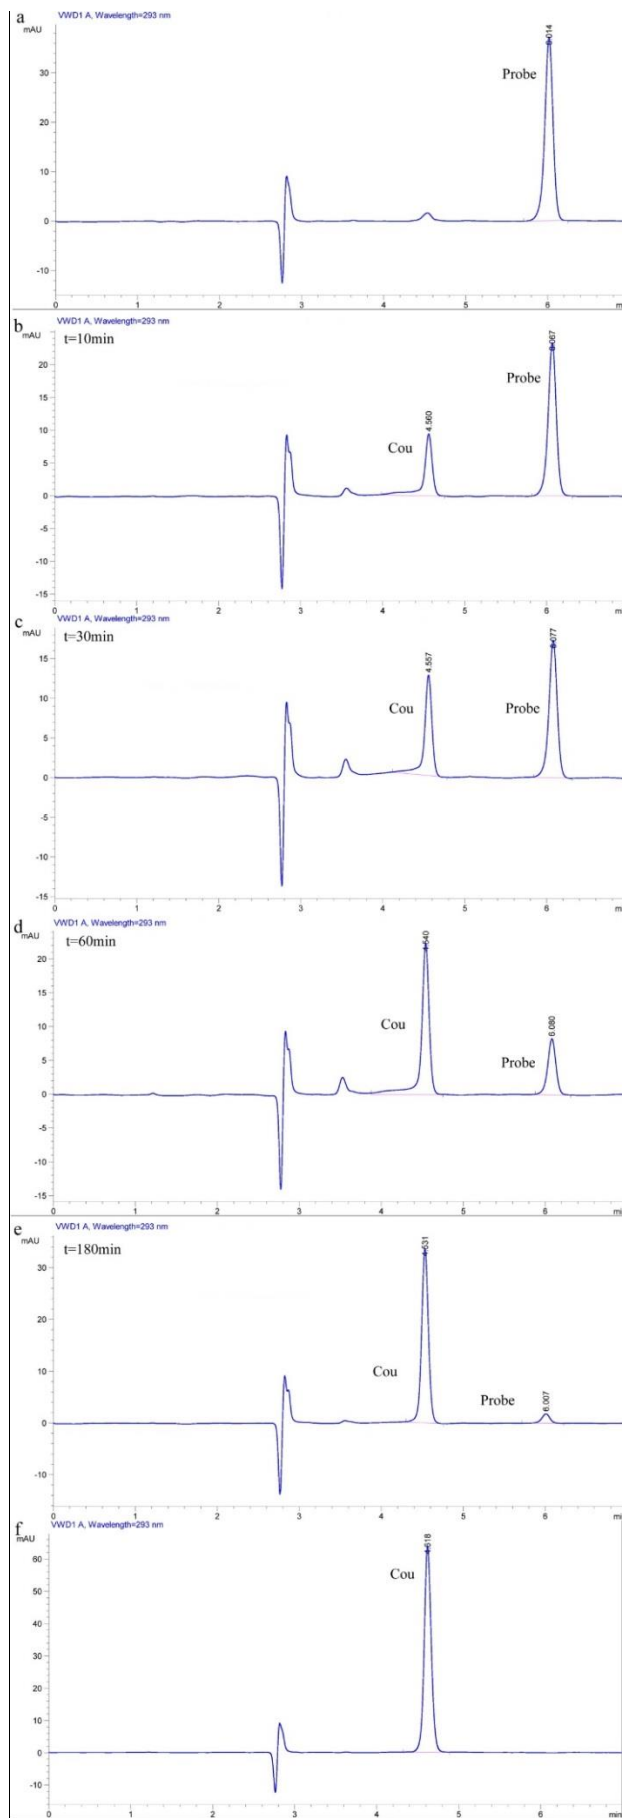

**Figure S7.** HPLC chromatogram in the reaction of probe (a):probe (50  $\mu$ M) in PBS (pH 7.4) buffer; (b): probe (50  $\mu$ M) reacted with Cys (10 equiv.) for 10min; (c): probe (50  $\mu$ M) reacted with Cys (10 equiv.) for 30min; (d): probe (50  $\mu$ M) reacted with Cys (10 equiv.) for 60min; (e): probe (50  $\mu$ M) reacted with Cys (10 equiv.) for 160min; (f): Coumarin (50  $\mu$ M) in PBS (pH 7.4) buffer.

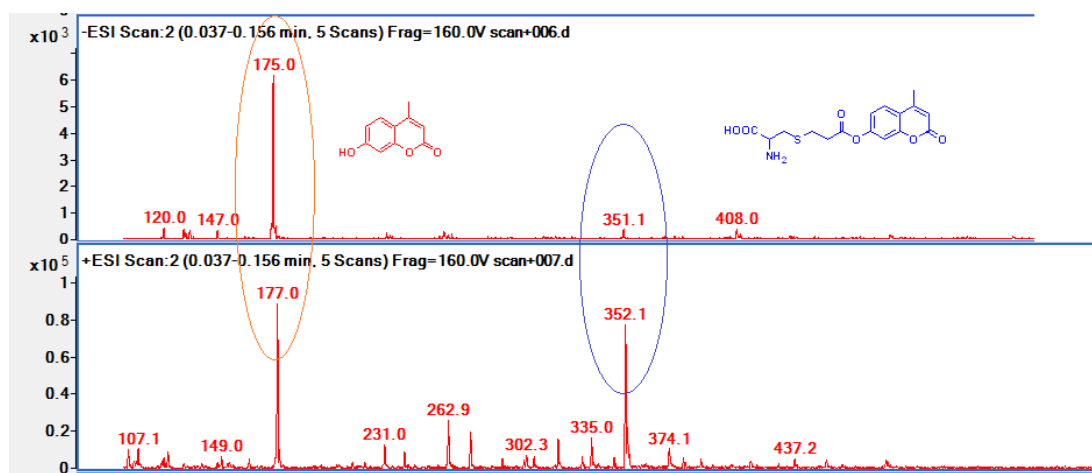

**Figure S8.** Mass spectrum of the crude product from the reaction of probe with Cys.
